# Supplementary material
Source: PubMed Central journal article supplement (PMC3031450)
Supplement: supp_glq083_glq083_Supplementary_materials.pdf [file supp_glq083_glq083_Supplementary_materials.pdf]

Supplementary Table 1. Study 1: Energy, macronutrient, calcium intakes before and after a 12-wk period of energy-restriction\*

| Parameter                            | Group          | Baseline | Post    |
|--------------------------------------|----------------|----------|---------|
| Energy <sup>†</sup> (kcal/d)         | normal protein | 1807±122 | 1419±46 |
|                                      | higher protein | 2234±151 | 1516±62 |
| Protein <sup>‡</sup> (g/d)           | normal protein | 75±6     | 62±2    |
|                                      | higher protein | 94±5     | 114±4   |
| Protein <sup>‡</sup> (% energy)      | normal protein | 17±1     | 17±0    |
|                                      | higher protein | 17±1     | 30±0    |
| Fat <sup>†</sup> (% energy)          | normal protein | 37±2     | 25±0    |
|                                      | higher protein | 35±1     | 26±0    |
| Carbohydrate <sup>†</sup> (% energy) | normal protein | 44±2     | 58±0    |
|                                      | higher protein | 49±2     | 45±0    |
| Calcium <sup>†</sup> (mg/d)          | normal protein | 706 ± 68 | 2030±46 |
|                                      | higher protein | 1158±147 | 2210±55 |

Notes: \*Mean±SEM; normal protein, n=15; higher protein, n=13.

<sup>†</sup>Significant change over time (pre to post), P< 0.0001.

<sup>‡</sup>Significant group-by-time interaction, P< 0.0001.

Supplementary Table 2. Protein sources in Study 1 and Study 2\*

|                      | Group          | Meat   | Dairy  | Egg  | Legumes | Grains | Other  |
|----------------------|----------------|--------|--------|------|---------|--------|--------|
| Study 1 <sup>†</sup> | normal protein | 0      | 36(53) | 4(5) | 4(6)    | 14(20) | 10(15) |
|                      | higher protein | 46(40) | 42(36) | 5(4) | 4(4)    | 9(8)   | 10(8)  |
| Study 2              | CARB           | 0      | 20(33) | 0    | 0       | 17(28) | 23(38) |
|                      | CHICKEN        | 25(30) | 20(24) | 0    | 0       | 15(18) | 22(27) |
|                      | BEEF           | 25(30) | 20(24) | 0    | 0       | 15(18) | 22(27) |

*Notes:* \*Values are presented as g/d (% of total protein intake). BEEF=moderate protein beef group (n=14), CHICKEN=moderate protein chicken group (n=15), CARB=lower protein, lacto-ovo vegetarian group (n=14), CONTROL=non-intervention control group (n=11).

<sup>†</sup>Based on a typical 1550 kcal/d diet.

Supplementary Table 3. Study 2: Energy, macronutrient, and bone parameters before and after a 12-wk period of energy-restriction \*

| Parameter                            | Group   | Baseline | Post                 |
|--------------------------------------|---------|----------|----------------------|
| Energy <sup>†</sup> (kcal/d)         | CONTROL | 1698±147 | 1570±191             |
|                                      | CARB    | 1699±125 | 1158±91 <sup>‡</sup> |
|                                      | CHICKEN | 1579±126 | 1098±52 <sup>‡</sup> |
|                                      | BEEF    | 1862±175 | 1114±41 <sup>‡</sup> |
| Protein <sup>†</sup> (g/d)           | CONTROL | 71±7     | 70±12                |
|                                      | CARB    | 75±5     | 51±5 <sup>‡</sup>    |
|                                      | CHICKEN | 68±9     | 67±3                 |
|                                      | BEEF    | 80±9     | 67±2                 |
| Protein <sup>†</sup> (% energy)      | CONTROL | 16±1     | 20±2                 |
|                                      | CARB    | 18±1     | 17±1                 |
|                                      | CHICKEN | 17±1     | 25±1 <sup>‡</sup>    |
|                                      | BEEF    | 17±1     | 24±1 <sup>‡</sup>    |
| Fat (% energy)                       | CONTROL | 36±2     | 33±2                 |
|                                      | CARB    | 34±2     | 24±2                 |
|                                      | CHICKEN | 36±2     | 24±1                 |
|                                      | BEEF    | 38±2     | 30±1                 |
| Carbohydrate <sup>†</sup> (% energy) | CONTROL | 49±2     | 47±1                 |
|                                      | CARB    | 49±2     | 59±2 <sup>‡</sup>    |
|                                      | CHICKEN | 48±3     | 51±1                 |
|                                      | BEEF    | 45±2     | 46±2                 |

|                |         |         |         |
|----------------|---------|---------|---------|
| Calcium (mg/d) | CONTROL | 765±72  | 928±126 |
|                | CARB    | 780±102 | 897±92  |
|                | CHICKEN | 647±87  | 783±80  |
|                | BEEF    | 741±101 | 630±65  |

---

*Notes:* \* Mean±SEM; BEEF=moderate protein beef group (n=14), CHICKEN=moderate protein chicken group (n=15), CARB=lower protein, lacto-ovo vegetarian group (n=14), CONTROL=non-intervention control group (n=11).

†Significant group-by-time interaction  $P < 0.05$ .

‡Significant difference compared with control  $P < 0.05$ .

Supplementary Table 4. Study 2: Markers of calcium metabolism and bone homeostasis before and after a 9-wk energy-restricted diet intervention in post-menopausal women\*

| Parameter                                      | Group   | Baseline | Post     | Change <sup>2</sup> |
|------------------------------------------------|---------|----------|----------|---------------------|
| Osteocalcin, S, ng/mL                          | CONTROL | 6.0±1.0  | 6.3±1.0  | 0.4±0.5             |
|                                                | CARB    | 7.4±1.2  | 6.6±1.4  | -0.8±0.9            |
|                                                | CHICKEN | 6.2±0.7  | 7.7±0.9  | 1.5±1.1             |
|                                                | BEEF    | 7.7±1.5  | 8.2±1.6  | 0.5±0.9             |
| B-S Alk Phos, S, ng/mL                         | CONTROL | 11.2±0.8 | 10.0±1.2 | -1.1±0.9            |
|                                                | CARB    | 12.5±0.8 | 11.0±0.8 | -1.6±0.9            |
|                                                | CHICKEN | 12.8±0.7 | 12.1±0.7 | -0.7±0.5            |
|                                                | BEEF    | 10.7±0.6 | 11.6±1.0 | 1.0±1.0             |
| N-telepeptide cross-links, U,<br>µml/g CR      | CONTROL | 279±45   | 300±52   | 21±27               |
|                                                | CARB    | 330±42   | 399±79   | 68±48               |
|                                                | CHICKEN | 451±52   | 431±63   | -21±47              |
|                                                | BEEF    | 365±43   | 369±59   | 3.2±47              |
| Deoxypyridinoline, U, mg/g CR                  | CONTROL | 49±4.2   | 49±4.0   | 0.52±2.35           |
|                                                | CARB    | 44±3.0   | 47±4.4   | 3.2±3.2             |
|                                                | CHICKEN | 48±4.1   | 53±4.5   | 4.4±3.8             |
|                                                | BEEF    | 51±3.2   | 46±3.2   | -4.7±2.1            |
| Parathyroid hormone <sup>†</sup> ,<br>S, pg/mL | CONTROL | 38±5     | 34±3     | -3.8±4.7            |

|                          |         |            |            |              |
|--------------------------|---------|------------|------------|--------------|
|                          | CARB    | 54±8       | 39±5       | -15±5        |
|                          | CHICKEN | 32±3       | 40±3       | 7.4±3.0      |
|                          | BEEF    | 56±5       | 48±5       | -7.7±5.0     |
| Calcium, U, mg/g CR      | CONTROL | 104±18     | 124±23     | 20±24        |
|                          | CARB    | 132±21     | 157±26     | 18±16        |
|                          | CHICKEN | 155±21     | 147±21     | -7.4±13.2    |
|                          | BEEF    | 92±13      | 124±12     | 32±14        |
| Calcium:creatinine ratio | CONTROL | 0.09±0.020 | 0.12±0.024 | 0.03±0.023   |
|                          | CARB    | 0.13±0.021 | 0.16±0.026 | 0.018±0.017  |
|                          | CHICKEN | 0.15±0.021 | 0.15±0.021 | -0.008±0.013 |
|                          | BEEF    | 0.09±0.013 | 0.12±0.012 | 0.03±0.014   |
| Phosphorous, U, mg/g CR  | CONTROL | 698±64     | 748±52     | 50±73        |
|                          | CARB    | 753±87     | 748±74     | -41±96       |
|                          | CHICKEN | 834±67     | 637±39     | -197±55      |
|                          | BEEF    | 723±69     | 674±42     | -49±71       |
| IGF-1, S, ng/mL          | CONTROL | 215±26     | 224±23     | 8.5±27       |
|                          | CARB    | 222±24     | 182±26     | -40±24       |
|                          | CHICKEN | 222±38     | 225±41     | 3.3±23.3     |
|                          | BEEF    | 242±34     | 244±39     | 2.2±18.5     |

---

*Notes:* \* Mean±SEM; BEEF=moderate protein beef group (n=14), CHICKEN=moderate protein chicken group (n=15), CARB=lower protein, lacto-ovo vegetarian group (n=14), CONTROL=non-intervention control group (n=11); CR, creatinine; U, 24-hour urine; S, serum; B-S Alk Phos, Bone-specific alkaline phosphatase.

†Serum parathyroid hormone level of CHICKEN group was different from CARB and BEEF groups.

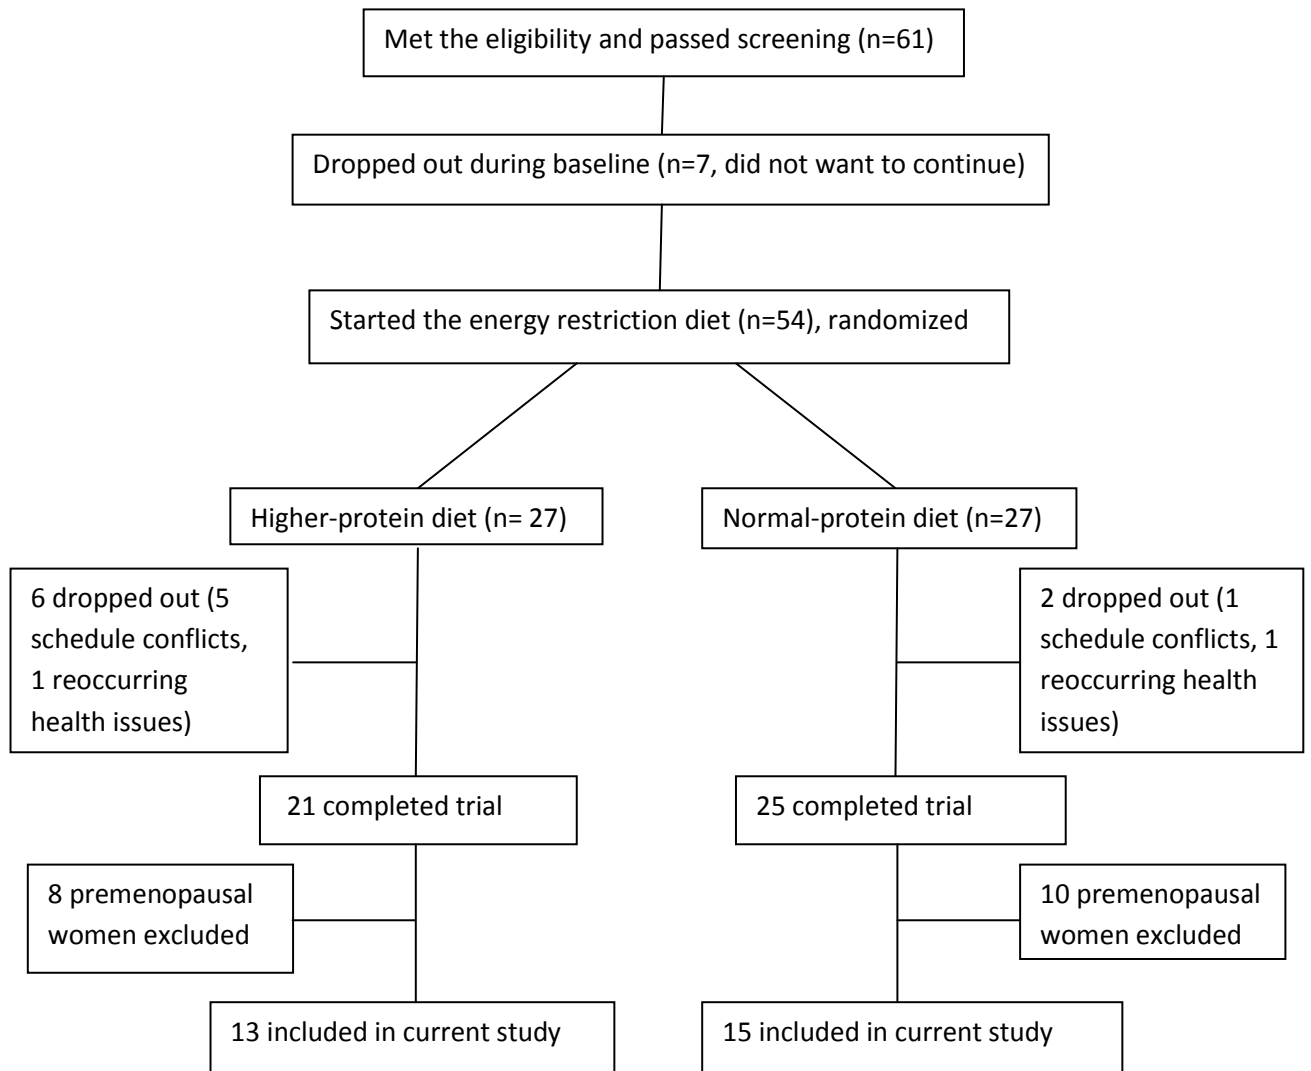

**Supplementary figure 1.** Recruitment and retention of participants of Study 1. NP: normal protein group, HP: higher-protein group.



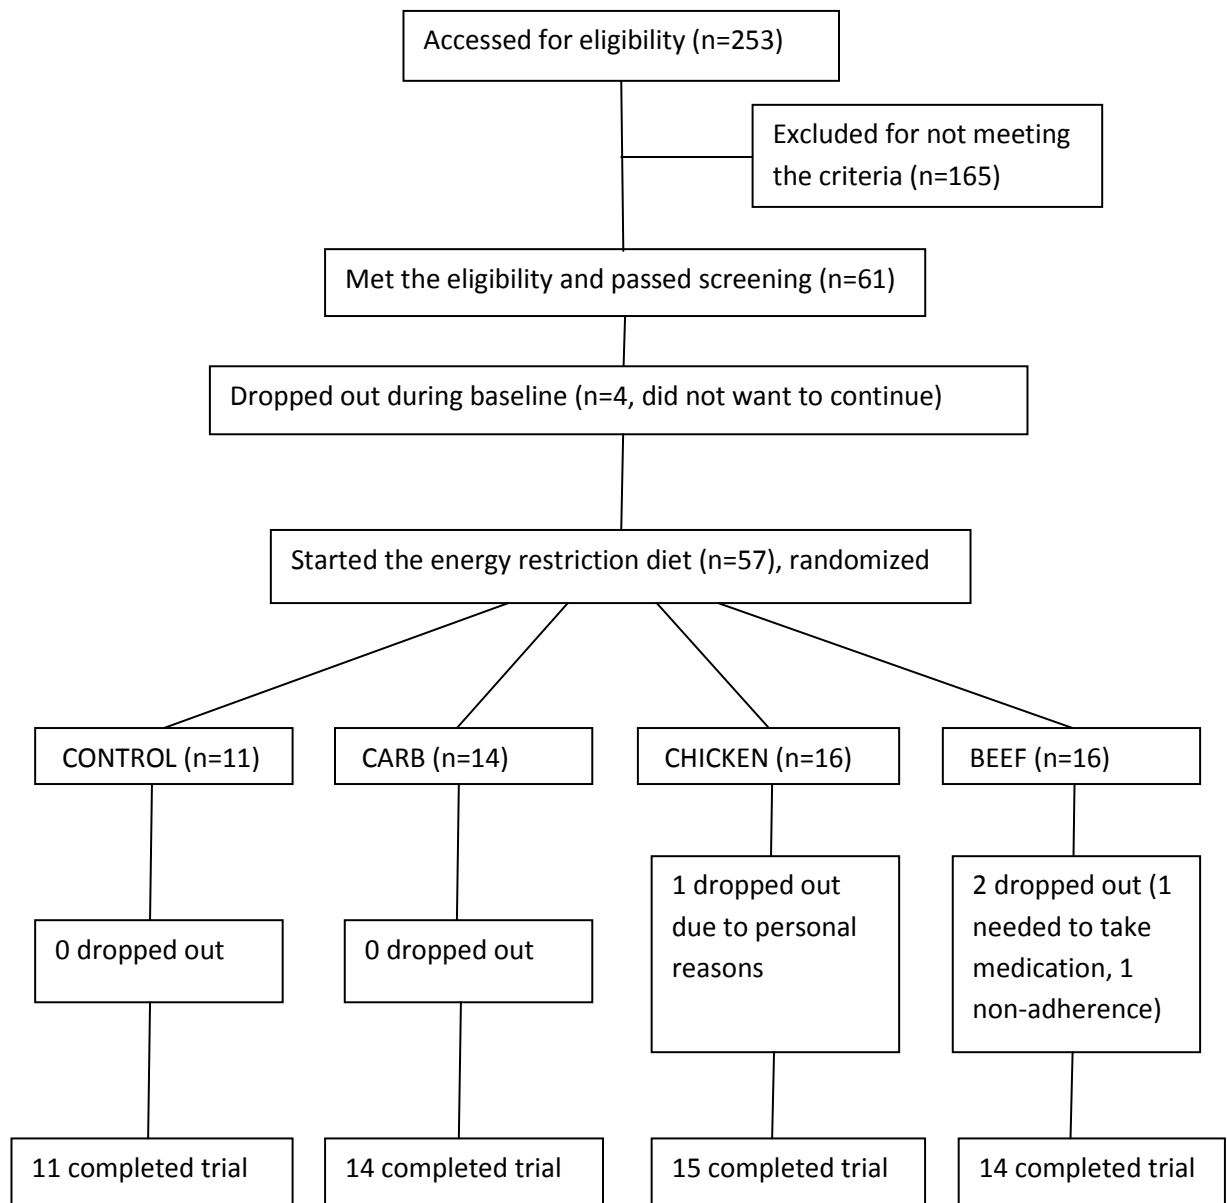

**Supplementary figure 2.** Recruitment and retention of participants of Study 2. CONTROL: non-intervention control group, CARB: lower protein, lacto-ovo vegetarian group, CHICKEN: higher-protein, chicken group, BEEF: higher-protein, beef group.
